# Supplementary material for: Changes in soil bacterial community and functions by substituting chemical fertilizer with biogas slurry in an apple orchard
Source: Front Plant Sci. 2022 Sep 20;13:1013184. doi: 10.3389/fpls.2022.1013184 (PMC9530944; doi:10.3389/fpls.2022.1013184)
Supplement: Supplementary file 2 [file DataSheet_2.xlsx]

## Sheet: Table S3
Table S3 Summary of functional group assignments by FAPROTAX method
Functional group	Assignment	Records
aerobic chemoheterotrophy		3199
	Gemmatimonas	583
	Gaiella	321
	Sphingomonas	168
	Paenibacillus	147
	Solirubrobacter	123
	Chondromyces	121
	Legionella	101
	Nocardioides	80
	Aciditerrimonas	70
	Streptomyces	56
	Conexibacter	54
	Pseudomonas	41
	Litorilinea	39
	Blastopirellula	35
	Rubrobacter	34
	Skermanella	34
	Novosphingobium	33
	Pseudonocardia	31
	Hyphomicrobium	29
	Devosia	27
	Reyranella	26
	Microvirga	25
	Rhodoplanes	22
	Actinomadura	21
	Burkholderia	20
	Cystobacter	20
	Mycobacterium	20
	Pedomicrobium	20
	Actinoplanes	18
	Pedobacter	18
	Adhaeribacter	16
	Blastocatella	16
	Micromonospora	16
	Singulisphaera	16
	Tumebacillus	16
	Altererythrobacter	15
	Mesorhizobium	15
	Paracoccus	15
	Porphyrobacter	15
	Pseudolabrys	15
	Azospirillum	14
	Chryseolinea	14
	Ilumatobacter	14
	Acinetobacter	13
	Jatrophihabitans	13
	Sphingobium	13
	Virgisporangium	13
	Caulobacter	12
	Ensifer	12
	Nannocystis	12
	Flavobacterium	10
	Luteolibacter	10
	Roseomonas	10
	Bauldia	9
	Bosea	9
	Prosthecobacter	9
	Vasilyevaea	9
	Aeromicrobium	8
	Agromyces	8
	Anaeromyxobacter	8
	Blastococcus	8
	Dactylosporangium	8
	Stenotrophomonas	8
	Acidothermus	7
	Actinophytocola	7
	Arenimonas	7
	Modestobacter	7
	Nonomuraea	7
	Sporichthya	7
	Actinoallomurus	6
	Actinocorallia	6
	Bradyrhizobium	6
	Comamonas	6
	Halomonas	6
	Labrys	6
	Mycoplasma	6
	Nocardia	6
	Sphingopyxis	6
	Ammoniphilus	5
	Asticcacaulis	5
	Cellulomonas	5
	Chelatococcus	5
	Chryseobacterium	5
	Leucobacter	5
	Rhizomicrobium	5
	Segetibacter	5
	Vibrio	5
	Acidobacterium	4
	Cupriavidus	4
	Dyadobacter	4
	Idiomarina	4
	Lewinella	4
	Marinobacter	4
	Parvibaculum	4
	Rhodanobacter	4
	Acholeplasma	3
	Actinospica	3
	Alcanivorax	3
	Aliidiomarina	3
	Dechloromonas	3
	Euzebya	3
	Ferruginibacter	3
	Gemmobacter	3
	Hydrogenophaga	3
	Kocuria	3
	Microbacterium	3
	Microbispora	3
	Nakamurella	3
	Neisseria	3
	Pseudoalteromonas	3
	Rhodopirellula	3
	Rubellimicrobium	3
	Shewanella	3
	Telmatobacter	3
	Thalassotalea	3
	Thauera	3
	Acidicaldus	2
	Acidiphilium	2
	Acidisoma	2
	Acidocella	2
	Actinosynnema	2
	Angustibacter	2
	Brevibacterium	2
	Catellatospora	2
	Couchioplanes	2
	Cryptosporangium	2
	Dietzia	2
	Haemophilus	2
	Hyphomonas	2
	Iamia	2
	Kineosporia	2
	Kitasatospora	2
	Knoellia	2
	Leifsonia	2
	Marinobacterium	2
	Marinospirillum	2
	Marmoricola	2
	Micrococcus	2
	Microlunatus	2
	Moheibacter	2
	Nesterenkonia	2
	Nevskia	2
	Ornithinibacter	2
	Pelagibacterium	2
	Phycicoccus	2
	Psychrobacter	2
	Rhodopseudomonas	2
	Roseimicrobium	2
	Rugosimonospora	2
	Saccharomonospora	2
	Saccharopolyspora	2
	Salinibacterium	2
	Sphaerisporangium	2
	Sphaerotilus	2
	Sphingosinicella	2
	Terrabacter	2
	Achromobacter	1
	Acidovorax	1
	Acrocarpospora	1
	Actinotalea	1
	Aequorivita	1
	Akkermansia	1
	Alcaligenes	1
	Algoriphagus	1
	Alishewanella	1
	Alteromonas	1
	Ancylobacter	1
	Atopobium	1
	Azospira	1
	Azotobacter	1
	Bacillus	1
	Blastochloris	1
	Brachybacterium	1
	Cellulosimicrobium	1
	Chromatocurvus	1
	Crocinitomix	1
	Cryobacterium	1
	Demequina	1
	Diaphorobacter	1
	Enhydrobacter	1
	Enterovibrio	1
	Erythrobacter	1
	Erythromicrobium	1
	Flavitalea	1
	Fluviicola	1
	Geobacillus	1
	Herbiconiux	1
	Intrasporangium	1
	Isosphaera	1
	Kibdelosporangium	1
	Kutzneria	1
	Limnobacter	1
	Litoreibacter	1
	Luedemannella	1
	Marivita	1
	Nautella	1
	Oceanicaulis	1
	Phaselicystis	1
	Photobacterium	1
	Phyllobacterium	1
	Phytohabitans	1
	Pleomorphomonas	1
	Pseudohongiella	1
	Rhizorhabdus	1
	Rhizorhapis	1
	Roseovarius	1
	Salicola	1
	Salinicola	1
	Salinimonas	1
	Sandaracinobacter	1
	Sphingorhabdus	1
	Stappia	1
	Streptosporangium	1
	Tenacibaculum	1
	Thalassolituus	1
	Thermomonas	1
	Tsukamurella	1
	Verrucomicrobium	1
	Verrucosispora	1
	Williamsia	1
	Xanthomonas	1
	Zoogloea	1
chemoheterotrophy		3743
	Gemmatimonas	583
	Gaiella	321
	Sphingomonas	168
	Paenibacillus	147
	Solirubrobacter	123
	Chondromyces	121
	Legionella	101
	Nocardioides	80
	Opitutus	75
	Aciditerrimonas	70
	Streptomyces	56
	Conexibacter	54
	Pseudomonas	41
	Litorilinea	39
	Blastopirellula	35
	Rubrobacter	34
	Skermanella	34
	Novosphingobium	33
	Pseudonocardia	31
	Bacteroides	30
	Hyphomicrobium	29
	Methylobacterium	28
	Devosia	27
	Lysobacter	26
	Reyranella	26
	Microvirga	25
	Rhodoplanes	22
	Actinomadura	21
	Burkholderia	20
	Cystobacter	20
	Mycobacterium	20
	Pedomicrobium	20
	Actinoplanes	18
	Lactobacillus	18
	Pedobacter	18
	Adhaeribacter	16
	Blastocatella	16
	Desulfomonile	16
	Micromonospora	16
	Singulisphaera	16
	Tumebacillus	16
	Altererythrobacter	15
	Mesorhizobium	15
	Paracoccus	15
	Porphyrobacter	15
	Pseudolabrys	15
	Alistipes	14
	Azospirillum	14
	Chryseolinea	14
	Ilumatobacter	14
	Acinetobacter	13
	Jatrophihabitans	13
	Sphingobium	13
	Virgisporangium	13
	Caulobacter	12
	Clostridium XlVa	12
	Ensifer	12
	Nannocystis	12
	Clostridium sensu stricto	10
	Flavobacterium	10
	Luteolibacter	10
	Roseomonas	10
	Streptococcus	10
	Bauldia	9
	Bosea	9
	Prosthecobacter	9
	Vasilyevaea	9
	Aeromicrobium	8
	Agromyces	8
	Anaeromyxobacter	8
	Blastococcus	8
	Blautia	8
	Byssovorax	8
	Cellvibrio	8
	Dactylosporangium	8
	Gracilibacter	8
	Parabacteroides	8
	Ruminococcus	8
	Stenotrophomonas	8
	Acidothermus	7
	Actinophytocola	7
	Arenimonas	7
	Eubacterium	7
	Methanomassiliicoccus	7
	Modestobacter	7
	Nonomuraea	7
	Petrimonas	7
	Sporichthya	7
	Actinoallomurus	6
	Actinocorallia	6
	Barnesiella	6
	Bradyrhizobium	6
	Clostridium XI	6
	Comamonas	6
	Halomonas	6
	Labrys	6
	Mycoplasma	6
	Nocardia	6
	Sphingopyxis	6
	Alterococcus	5
	Ammoniphilus	5
	Asticcacaulis	5
	Bifidobacterium	5
	Cellulomonas	5
	Chelatococcus	5
	Chryseobacterium	5
	Desulfosporosinus	5
	Faecalibacterium	5
	Leucobacter	5
	Methylobacillus	5
	Rhizomicrobium	5
	Roseburia	5
	Segetibacter	5
	Veillonella	5
	Vibrio	5
	Acidobacterium	4
	Cupriavidus	4
	Dyadobacter	4
	Fusobacterium	4
	Idiomarina	4
	Lewinella	4
	Marinobacter	4
	Methylocaldum	4
	Methylotenera	4
	Parvibaculum	4
	Rhodanobacter	4
	Rhodococcus	4
	Rothia	4
	Sedimentibacter	4
	Sporobacter	4
	Turicibacter	4
	Acholeplasma	3
	Actinomyces	3
	Actinospica	3
	Alcanivorax	3
	Aliidiomarina	3
	Allobaculum	3
	Atopostipes	3
	Bacillus	3
	Clostridium IV	3
	Coprococcus	3
	Corallococcus	3
	Dechloromonas	3
	Dorea	3
	Enterococcus	3
	Euzebya	3
	Ferruginibacter	3
	Gardnerella	3
	Gemmiger	3
	Gemmobacter	3
	Hydrogenophaga	3
	Kocuria	3
	Lachnospiracea incertae sedis	3
	Lautropia	3
	Microbacterium	3
	Microbispora	3
	Nakamurella	3
	Neisseria	3
	Pelotomaculum	3
	Phascolarctobacterium	3
	Proteiniclasticum	3
	Pseudoalteromonas	3
	Rhodopirellula	3
	Romboutsia	3
	Rubellimicrobium	3
	Shewanella	3
	Telmatobacter	3
	Terrisporobacter	3
	Thalassotalea	3
	Thauera	3
	Acidicaldus	2
	Acidiphilium	2
	Acidisoma	2
	Acidocella	2
	Actinosynnema	2
	Aerococcus	2
	Algiphilus	2
	Anaerostipes	2
	Angustibacter	2
	Brevibacterium	2
	Catellatospora	2
	Cetobacterium	2
	Clostridium III	2
	Cohnella	2
	Collinsella	2
	Couchioplanes	2
	Cryptosporangium	2
	Desulfuromonas	2
	Dietzia	2
	Gemella	2
	Haemophilus	2
	Hyphomonas	2
	Iamia	2
	Kineosporia	2
	Kitasatospora	2
	Knoellia	2
	Lactococcus	2
	Leifsonia	2
	Marinobacterium	2
	Marinospirillum	2
	Marmoricola	2
	Methylophilus	2
	Micrococcus	2
	Microlunatus	2
	Moheibacter	2
	Nesterenkonia	2
	Nevskia	2
	Olsenella	2
	Ornithinibacter	2
	Pantoea	2
	Papillibacter	2
	Pelagibacterium	2
	Phycicoccus	2
	Psychrobacter	2
	Rhodopseudomonas	2
	Roseimicrobium	2
	Rugosimonospora	2
	Saccharomonospora	2
	Saccharopolyspora	2
	Salinibacterium	2
	Selenomonas	2
	Serratia	2
	Sorangium	2
	Sphaerisporangium	2
	Sphaerotilus	2
	Sphingosinicella	2
	Sporolactobacillus	2
	Succinivibrio	2
	Syntrophorhabdus	2
	Terrabacter	2
	Thermomarinilinea	2
	Abiotrophia	1
	Acetivibrio	1
	Achromobacter	1
	Acidaminococcus	1
	Acidovorax	1
	Acrocarpospora	1
	Actinotalea	1
	Aequorivita	1
	Aeromonas	1
	Akkermansia	1
	Alcaligenes	1
	Algoriphagus	1
	Alishewanella	1
	Alkaliphilus	1
	Alloprevotella	1
	Alloscardovia	1
	Alteromonas	1
	Amycolatopsis	1
	Anaerolinea	1
	Ancylobacter	1
	Atopobium	1
	Azoarcus	1
	Azospira	1
	Azotobacter	1
	Blastochloris	1
	Brachybacterium	1
	Butyrivibrio	1
	Cellulosimicrobium	1
	Chitinophaga	1
	Chromatocurvus	1
	Cloacibacterium	1
	Clostridium XVIII	1
	Corynebacterium	1
	Crocinitomix	1
	Cryobacterium	1
	Demequina	1
	Desulfobulbus	1
	Desulfococcus	1
	Desulforhopalus	1
	Diaphorobacter	1
	Enhydrobacter	1
	Enterovibrio	1
	Erwinia	1
	Erythrobacter	1
	Erythromicrobium	1
	Escherichia/Shigella	1
	Flavitalea	1
	Fluviicola	1
	Fusibacter	1
	Geobacillus	1
	Georgenia	1
	Georgfuchsia	1
	Herbiconiux	1
	Holophaga	1
	Hydrocarboniphaga	1
	Intestinibacter	1
	Intrasporangium	1
	Isosphaera	1
	Kibdelosporangium	1
	Kutzneria	1
	Limnobacter	1
	Litoreibacter	1
	Luedemannella	1
	Marivita	1
	Megasphaera	1
	Methylibium	1
	Methylobacter	1
	Methylocapsa	1
	Methyloparacoccus	1
	Methylophaga	1
	Methylovirgula	1
	Nautella	1
	Oceanicaulis	1
	Oscillibacter	1
	Oxalophagus	1
	Oxobacter	1
	Pelolinea	1
	Phaselicystis	1
	Photobacterium	1
	Phyllobacterium	1
	Phytohabitans	1
	Pleomorphomonas	1
	Porphyromonas	1
	Promicromonospora	1
	Propionibacterium	1
	Pseudohongiella	1
	Ralstonia	1
	Rhizorhabdus	1
	Rhizorhapis	1
	Roseovarius	1
	Salicola	1
	Salinicola	1
	Salinimonas	1
	Salmonella	1
	Sandaracinobacter	1
	Sphingorhabdus	1
	Spirochaeta	1
	Sporacetigenium	1
	Sporosarcina	1
	Sporotomaculum	1
	Stappia	1
	Streptosporangium	1
	Syntrophobotulus	1
	Syntrophus	1
	Taonella	1
	Tenacibaculum	1
	Thalassolituus	1
	Thermicanus	1
	Thermoactinomyces	1
	Thermobacillus	1
	Thermomonas	1
	Thermovirga	1
	Trichococcus	1
	Tsukamurella	1
	Verrucomicrobium	1
	Verrucosispora	1
	Weissella	1
	Williamsia	1
	Xanthomonas	1
	Yersinia	1
	Zoogloea	1
nitrate reduction		724
	Achromobacter	1
	Gaiella	321
	Opitutus	75
	Conexibacter	54
	Rubrobacter	34
	Rhodoplanes	22
	Paracoccus	15
	Ensifer	12
	Anaeromyxobacter	8
	Bacillus	8
	Paenibacillus	8
	Stenotrophomonas	8
	Petrimonas	7
	Steroidobacter	7
	Rhizomicrobium	5
	Thiobacillus	5
	Veillonella	5
	Vibrio	5
	Azoarcus	4
	Cupriavidus	4
	Mizugakiibacter	4
	Modestobacter	4
	Pedomicrobium	4
	Dechloromonas	3
	Gemmobacter	3
	Nocardioides	3
	Shewanella	3
	Staphylococcus	3
	Thauera	3
	Thioprofundum	3
	Actinosynnema	2
	Anaerostipes	2
	Buchnera	2
	Cetobacterium	2
	Comamonas	2
	Couchioplanes	2
	Haemophilus	2
	Humibacter	2
	Iamia	2
	Knoellia	2
	Kocuria	2
	Marinospirillum	2
	Methylobacillus	2
	Rothia	2
	Salinibacterium	2
	Serratia	2
	Tumebacillus	2
	Acinetobacter	1
	Actinopolymorpha	1
	Actinotalea	1
	Aeromonas	1
	Afipia	1
	Agromyces	1
	Alishewanella	1
	Aneurinibacillus	1
	Aquamicrobium	1
	Arenimonas	1
	Arsenophonus	1
	Arthrobacter	1
	Azospira	1
	Azospirillum	1
	Bilophila	1
	Brevibacillus	1
	Clostridium sensu stricto	1
	Corynebacterium	1
	Desulfococcus	1
	Desulforhopalus	1
	Desulfovibrio	1
	Diaphorobacter	1
	Enhydrobacter	1
	Escherichia/Shigella	1
	Georgfuchsia	1
	Helicobacter	1
	Hyphomonas	1
	Intrasporangium	1
	Kitasatospora	1
	Kutzneria	1
	Leucobacter	1
	Meiothermus	1
	Microbacterium	1
	Microlunatus	1
	Morganella	1
	Morococcus	1
	Nisaea	1
	Nitrobacter	1
	Nocardia	1
	Nonomuraea	1
	Oceanicaulis	1
	Pseudomonas	1
	Salmonella	1
	Streptomyces	1
	Sulfuricella	1
	Terrabacter	1
	Varibaculum	1
	Virgibacillus	1
	Zoogloea	1
fermentation		480
	Opitutus	75
	Skermanella	34
	Bacteroides	30
	Lactobacillus	18
	Desulfomonile	16
	Alistipes	14
	Clostridium XlVa	12
	Clostridium sensu stricto	10
	Streptococcus	10
	Blautia	8
	Gracilibacter	8
	Parabacteroides	8
	Ruminococcus	8
	Eubacterium	7
	Petrimonas	7
	Barnesiella	6
	Clostridium XI	6
	Alterococcus	5
	Bifidobacterium	5
	Cellulomonas	5
	Desulfosporosinus	5
	Faecalibacterium	5
	Rhizomicrobium	5
	Roseburia	5
	Veillonella	5
	Vibrio	5
	Fusobacterium	4
	Rothia	4
	Sedimentibacter	4
	Sporobacter	4
	Turicibacter	4
	Actinomyces	3
	Allobaculum	3
	Atopostipes	3
	Clostridium IV	3
	Coprococcus	3
	Dorea	3
	Enterococcus	3
	Gardnerella	3
	Gemmiger	3
	Lautropia	3
	Phascolarctobacterium	3
	Proteiniclasticum	3
	Romboutsia	3
	Telmatobacter	3
	Terrisporobacter	3
	Aerococcus	2
	Anaerostipes	2
	Cetobacterium	2
	Clostridium III	2
	Collinsella	2
	Desulfuromonas	2
	Dyadobacter	2
	Gemella	2
	Haemophilus	2
	Lachnospiracea incertae sedis	2
	Lactococcus	2
	Leifsonia	2
	Olsenella	2
	Pantoea	2
	Selenomonas	2
	Serratia	2
	Sorangium	2
	Sporolactobacillus	2
	Succinivibrio	2
	Syntrophorhabdus	2
	Thermomarinilinea	2
	Abiotrophia	1
	Acetivibrio	1
	Acidaminococcus	1
	Actinotalea	1
	Aeromonas	1
	Alkaliphilus	1
	Alloprevotella	1
	Alloscardovia	1
	Anaerolinea	1
	Atopobium	1
	Bacillus	1
	Butyrivibrio	1
	Cellulosimicrobium	1
	Cloacibacterium	1
	Clostridium XVIII	1
	Corynebacterium	1
	Desulfobulbus	1
	Desulforhopalus	1
	Enhydrobacter	1
	Enterovibrio	1
	Erwinia	1
	Escherichia/Shigella	1
	Fusibacter	1
	Georgenia	1
	Holophaga	1
	Intestinibacter	1
	Megasphaera	1
	Oscillibacter	1
	Oxalophagus	1
	Oxobacter	1
	Pelolinea	1
	Photobacterium	1
	Porphyromonas	1
	Promicromonospora	1
	Propionibacterium	1
	Salmonella	1
	Spirochaeta	1
	Sporacetigenium	1
	Sporosarcina	1
	Sporotomaculum	1
	Syntrophobotulus	1
	Syntrophus	1
	Taonella	1
	Thermicanus	1
	Thermovirga	1
	Trichococcus	1
	Verrucomicrobium	1
	Weissella	1
	Yersinia	1
intracellular parasites		388
	Aquicella	170
	Legionella	101
	Parachlamydia	23
	Simkania	9
	Neochlamydia	8
	Rickettsia	3
	Coxiella	1
	Diplorickettsia	1
predatory or exoparasitic		240
	Haliangium	218
	Bdellovibrio	15
	Cupriavidus	4
	Vampirovibrio	2
	Phaselicystis	1
ureolysis		195
	Nitrososphaera	46
	Methylobacterium	28
	Massilia	20
	Singulisphaera	16
	Mesorhizobium	15
	Azospirillum	14
	Roseomonas	10
	Euzebya	3
	Rhodobacter	3
	Brevibacillus	2
	Chitinophaga	2
	Duganella	2
	Humibacter	2
	Methylobacillus	2
	Methylophilus	2
	Rhizobacter	2
	Sporosarcina	2
	Actinocorallia	1
	Afipia	1
	Aminobacter	1
	Arenimonas	1
	Azotobacter	1
	Bacillus	1
	Corynebacterium	1
	Ferruginibacter	1
	Goodfellowiella	1
	Herbaspirillum	1
	Kineosporia	1
	Kocuria	1
	Lentzea	1
	Microbacterium	1
	Modestobacter	1
	Morganella	1
	Mycobacterium	1
	Polymorphospora	1
	Ralstonia	1
	Staphylococcus	1
	Starkeya	1
	Thermomonas	1
	Ureaplasma	1
	Verrucomicrobium	1
xylanolysis		149
	Opitutus	75
	Chryseolinea	14
	Singulisphaera	13
	Paenibacillus	11
	Bacteroides	7
	Acidobacterium	4
	Clostridium XlVa	3
	Corallococcus	3
	Telmatobacter	3
	Clostridium III	2
	Cohnella	2
	Sorangium	2
	Actinomadura	1
	Actinotalea	1
	Amycolatopsis	1
	Clostridium sensu stricto	1
	Lachnospiracea incertae sedis	1
	Pelolinea	1
	Ruminococcus	1
	Saccharomonospora	1
	Thermoactinomyces	1
	Thermobacillus	1
animal parasites or symbionts		145
	Bacteroides	12
	Roseomonas	10
	Clostridium XlVa	8
	Prevotella	8
	Stenotrophomonas	8
	Ruminococcus	6
	Faecalibacterium	5
	Flavonifractor	5
	Parabacteroides	5
	Roseburia	5
	Clostridium XI	4
	Streptococcus	4
	Coprococcus	3
	Dorea	3
	Gardnerella	3
	Lachnospiracea incertae sedis	3
	Acinetobacter	2
	Bifidobacterium	2
	Blautia	2
	Bordetella	2
	Campylobacter	2
	Clostridium IV	2
	Clostridium sensu stricto	2
	Haemophilus	2
	Helicobacter	2
	Lactobacillus	2
	Legionella	2
	Lysinibacillus	2
	Ruminococcus2	2
	Acidaminococcus	1
	Afipia	1
	Akkermansia	1
	Alcaligenes	1
	Arsenophonus	1
	Bacillus	1
	Clostridium XVIII	1
	Coxiella	1
	Desulfovibrio	1
	Eggerthella	1
	Enhydrobacter	1
	Escherichia/Shigella	1
	Finegoldia	1
	Mobiluncus	1
	Moraxella	1
	Morganella	1
	Mycobacterium	1
	Mycoplasma	1
	Nocardia	1
	Propionibacterium	1
	Pseudomonas	1
	Salmonella	1
	Staphylococcus	1
	Vibrio	1
nitrification		130
	Nitrospira	57
	Nitrososphaera	46
	Nitrosomonas	11
	Nitrosospira	4
	Nitrobacter	1
	Nitrolancea	1
	Nitrosopumilus	1
anoxygenic photoautotrophy		34
	Rhodoplanes	22
	Rhodobacter	3
	Chlorobium	2
	Blastochloris	1
aromatic compound degradation		128
	Nocardioides	80
	Acinetobacter	13
	Clostridium XI	4
	Rhodococcus	4
	Sporobacter	4
	Pelotomaculum	3
	Algiphilus	2
	Papillibacter	2
	Stenotrophomonas	2
	Syntrophorhabdus	2
	Azoarcus	1
	Bacillus	1
	Desulfococcus	1
	Georgfuchsia	1
	Holophaga	1
	Hydrocarboniphaga	1
	Marinobacterium	1
	Methylibium	1
	Mycobacterium	1
	Paenibacillus	1
	Pseudomonas	1
	Ralstonia	1
human associated		125
	Bacteroides	12
	Roseomonas	10
	Clostridium XlVa	8
	Stenotrophomonas	8
	Ruminococcus	6
	Faecalibacterium	5
	Flavonifractor	5
	Parabacteroides	5
	Streptococcus	5
	Clostridium XI	4
	Coprococcus	3
	Dorea	3
	Gardnerella	3
	Lachnospiracea incertae sedis	3
	Lactobacillus	3
	Acinetobacter	2
	Bifidobacterium	2
	Blautia	2
	Clostridium IV	2
	Clostridium sensu stricto	2
	Legionella	2
	Roseburia	2
	Ruminococcus2	2
	Acidaminococcus	1
	Afipia	1
	Akkermansia	1
	Alcaligenes	1
	Bacillus	1
	Campylobacter	1
	Clostridium XVIII	1
	Coxiella	1
	Desulfovibrio	1
	Eggerthella	1
	Enhydrobacter	1
	Escherichia/Shigella	1
	Finegoldia	1
	Helicobacter	1
	Mobiluncus	1
	Moraxella	1
	Morganella	1
	Mycobacterium	1
	Mycoplasma	1
	Nocardia	1
	Prevotella	1
	Propionibacterium	1
	Pseudomonas	1
	Salmonella	1
	Staphylococcus	1
	Vibrio	1
nitrogen respiration		123
	Rhodoplanes	22
	Paracoccus	15
	Anaeromyxobacter	8
	Stenotrophomonas	8
	Petrimonas	7
	Steroidobacter	7
	Rhizomicrobium	5
	Azoarcus	4
	Mizugakiibacter	4
	Dechloromonas	3
	Gemmobacter	3
	Nocardioides	3
	Shewanella	3
	Thauera	3
	Thioprofundum	3
	Comamonas	2
	Iamia	2
	Achromobacter	1
	Alcaligenes	1
	Alishewanella	1
	Aquamicrobium	1
	Azospira	1
	Azospirillum	1
	Bilophila	1
	Candidatus Kuenenia	1
	Clostridium sensu stricto	1
	Desulfococcus	1
	Desulforhopalus	1
	Desulfovibrio	1
	Georgfuchsia	1
	Hyphomonas	1
	Intrasporangium	1
	Nisaea	1
	Nitrobacter	1
	Pseudomonas	1
	Sulfuricella	1
	Thiobacillus	1
	Zoogloea	1
nitrate respiration		120
	Rhodoplanes	22
	Paracoccus	15
	Anaeromyxobacter	8
	Stenotrophomonas	8
	Petrimonas	7
	Steroidobacter	7
	Rhizomicrobium	5
	Azoarcus	4
	Mizugakiibacter	4
	Dechloromonas	3
	Gemmobacter	3
	Nocardioides	3
	Shewanella	3
	Thauera	3
	Thioprofundum	3
	Comamonas	2
	Iamia	2
	Achromobacter	1
	Alishewanella	1
	Aquamicrobium	1
	Azospira	1
	Azospirillum	1
	Bilophila	1
	Desulfococcus	1
	Desulforhopalus	1
	Desulfovibrio	1
	Georgfuchsia	1
	Hyphomonas	1
	Intrasporangium	1
	Nisaea	1
	Nitrobacter	1
	Pseudomonas	1
	Sulfuricella	1
	Thiobacillus	1
	Zoogloea	1
iron respiration		106
	Aciditerrimonas	70
	Geobacter	16
	Anaeromyxobacter	8
	Rhizomicrobium	5
	Acidicaldus	2
	Desulfuromonas	2
	Bacillus	1
	Desulfovibrio	1
	Georgfuchsia	1
methylotrophy		87
	Methylobacterium	28
	Paracoccus	15
	Bauldia	9
	Methanomassiliicoccus	7
	Methylobacillus	5
	Methylocaldum	4
	Methylotenera	4
	Methylophilus	2
	Marinobacterium	1
	Methylibium	1
	Methylobacter	1
	Methylocapsa	1
	Methyloparacoccus	1
	Methylophaga	1
	Methylovirgula	1
	Pleomorphomonas	1
nitrite respiration		83
	Rhodoplanes	22
	Paracoccus	15
	Anaeromyxobacter	8
	Petrimonas	7
	Steroidobacter	7
	Nocardioides	3
	Thauera	3
	Comamonas	2
	Iamia	2
	Alcaligenes	1
	Azospirillum	1
	Candidatus Kuenenia	1
	Clostridium sensu stricto	1
	Desulfococcus	1
	Desulforhopalus	1
	Desulfovibrio	1
	Georgfuchsia	1
	Hyphomonas	1
	Nisaea	1
	Pseudomonas	1
	Sulfuricella	1
	Thiobacillus	1
	Zoogloea	1
human gut		79
	Bacteroides	12
	Clostridium XlVa	8
	Ruminococcus	6
	Faecalibacterium	5
	Flavonifractor	5
	Parabacteroides	5
	Coprococcus	3
	Dorea	3
	Gardnerella	3
	Lachnospiracea incertae sedis	3
	Bifidobacterium	2
	Blautia	2
	Clostridium IV	2
	Clostridium sensu stricto	2
	Lactobacillus	2
	Roseburia	2
	Ruminococcus2	2
	Acidaminococcus	1
	Akkermansia	1
	Campylobacter	1
	Clostridium XI	1
	Clostridium XVIII	1
	Desulfovibrio	1
	Eggerthella	1
	Enhydrobacter	1
	Escherichia/Shigella	1
	Finegoldia	1
	Helicobacter	1
	Mobiluncus	1
mammal gut		79
	Bacteroides	12
	Clostridium XlVa	8
	Ruminococcus	6
	Faecalibacterium	5
	Flavonifractor	5
	Parabacteroides	5
	Coprococcus	3
	Dorea	3
	Gardnerella	3
	Lachnospiracea incertae sedis	3
	Bifidobacterium	2
	Blautia	2
	Clostridium IV	2
	Clostridium sensu stricto	2
	Lactobacillus	2
	Roseburia	2
	Ruminococcus2	2
	Acidaminococcus	1
	Akkermansia	1
	Campylobacter	1
	Clostridium XI	1
	Clostridium XVIII	1
	Desulfovibrio	1
	Eggerthella	1
	Enhydrobacter	1
	Escherichia/Shigella	1
	Finegoldia	1
	Helicobacter	1
	Mobiluncus	1
aerobic ammonia oxidation		71
	Nitrososphaera	46
	Nitrosomonas	11
	Nitrosospira	4
	Nitrosopumilus	1
methanol oxidation		69
	Methylobacterium	28
	Paracoccus	15
	Bauldia	9
	Methylobacillus	5
	Methylotenera	4
	Methylophilus	2
	Marinobacterium	1
	Methylibium	1
	Methylophaga	1
	Methylovirgula	1
cellulolysis		68
	Blastocatella	16
	Byssovorax	8
	Cellvibrio	8
	Acidothermus	7
	Paenibacillus	7
	Dyadobacter	4
	Lewinella	4
	Ruminococcus	3
	Telmatobacter	3
	Clostridium III	2
	Sorangium	2
	Acetivibrio	1
	Actinotalea	1
	Cellulosimicrobium	1
	Clostridium XlVa	1
denitrification		61
	Rhodoplanes	22
	Paracoccus	15
	Steroidobacter	7
	Nocardioides	3
	Comamonas	2
	Iamia	2
	Alcaligenes	1
	Azospirillum	1
	Desulfococcus	1
	Georgfuchsia	1
	Hyphomonas	1
	Nisaea	1
	Pseudomonas	1
	Sulfuricella	1
	Thiobacillus	1
	Zoogloea	1
nitrite denitrification		61
	Rhodoplanes	22
	Paracoccus	15
	Steroidobacter	7
	Nocardioides	3
	Comamonas	2
	Iamia	2
	Alcaligenes	1
	Azospirillum	1
	Desulfococcus	1
	Georgfuchsia	1
	Hyphomonas	1
	Nisaea	1
	Pseudomonas	1
	Sulfuricella	1
	Thiobacillus	1
	Zoogloea	1
nitrous oxide denitrification		61
	Rhodoplanes	22
	Paracoccus	15
	Steroidobacter	7
	Nocardioides	3
	Comamonas	2
	Iamia	2
	Alcaligenes	1
	Azospirillum	1
	Desulfococcus	1
	Georgfuchsia	1
	Hyphomonas	1
	Nisaea	1
	Pseudomonas	1
	Sulfuricella	1
	Thiobacillus	1
	Zoogloea	1
nitrate denitrification		60
	Rhodoplanes	22
	Paracoccus	15
	Steroidobacter	7
	Nocardioides	3
	Comamonas	2
	Iamia	2
	Azospirillum	1
	Desulfococcus	1
	Georgfuchsia	1
	Hyphomonas	1
	Nisaea	1
	Pseudomonas	1
	Sulfuricella	1
	Thiobacillus	1
	Zoogloea	1
aerobic nitrite oxidation		59
	Nitrospira	57
	Nitrobacter	1
	Nitrolancea	1
phototrophy		53
	Rhodoplanes	22
	Porphyrobacter	15
	Rhodobacter	3
	Chlorobium	2
	Rhodopseudomonas	2
	Blastochloris	1
	Erythromicrobium	1
	Sandaracinobacter	1
human pathogens all		49
	Roseomonas	10
	Stenotrophomonas	8
	Streptococcus	4
	Clostridium XI	3
	Acinetobacter	2
	Legionella	2
	Afipia	1
	Alcaligenes	1
	Bacillus	1
	Bacteroides	1
	Campylobacter	1
	Coxiella	1
	Eggerthella	1
	Escherichia/Shigella	1
	Helicobacter	1
	Moraxella	1
	Morganella	1
	Mycobacterium	1
	Mycoplasma	1
	Nocardia	1
	Prevotella	1
	Propionibacterium	1
	Pseudomonas	1
	Salmonella	1
	Staphylococcus	1
	Vibrio	1
chitinolysis		46
	Lysobacter	26
	Blastocatella	16
	Stenotrophomonas	2
	Chitinophaga	1
	Clostridium sensu stricto	1
dark hydrogen oxidation		45
	Paracoccus	15
	Anaeromyxobacter	8
	Methanomassiliicoccus	7
	Desulfosporosinus	3
	Hydrogenophaga	3
	Desulfovibrio	2
	Methanobacterium	2
	Methanobrevibacter	2
	Dehalobacter	1
	Desulforhopalus	1
	Hydrogenophilus	1
photoheterotrophy		45
	Rhodoplanes	22
	Porphyrobacter	15
	Rhodobacter	3
	Rhodopseudomonas	2
	Blastochloris	1
	Erythromicrobium	1
	Sandaracinobacter	1
respiration of sulfur compounds		45
	Desulfomonile	16
	Desulfovibrio	7
	Desulfosporosinus	5
	Desulfovirga	3
	Desulfatiglans	2
	Desulfotomaculum	2
	Desulfuromonas	2
	Alishewanella	1
	Alkaliphilus	1
	Desulfatibacillum	1
	Desulfobulbus	1
	Desulfococcus	1
	Desulforhopalus	1
	Fusibacter	1
	Salmonella	1
sulfate respiration		39
	Desulfomonile	16
	Desulfovibrio	7
	Desulfosporosinus	5
	Desulfovirga	3
	Desulfatiglans	2
	Desulfotomaculum	2
	Desulfatibacillum	1
	Desulfobulbus	1
	Desulfococcus	1
	Desulforhopalus	1
hydrocarbon degradation		38
	Halomonas	6
	Marinobacter	4
	Methylocaldum	4
	Rhodococcus	4
	Alcanivorax	3
	Algiphilus	2
	Azoarcus	1
	Geobacillus	1
	Georgfuchsia	1
	Hydrocarboniphaga	1
	Methylobacter	1
	Methylocapsa	1
	Methyloparacoccus	1
	Mycobacterium	1
	Paenibacillus	1
	Pleomorphomonas	1
	Pseudomonas	1
	Ralstonia	1
nitrogen fixation		35
	Azospirillum	14
	Bradyrhizobium	6
	Ensifer	3
	Clostridium III	2
	Azospira	1
	Azotobacter	1
	Clostridium sensu stricto	1
	Herbaspirillum	1
	Mesorhizobium	1
	Methylocapsa	1
	Methylovirgula	1
	Paenibacillus	1
	Pleomorphomonas	1
	Sphingomonas	1
photoautotrophy		34
	Rhodoplanes	22
	Rhodobacter	3
	Chlorobium	2
	Blastochloris	1
anoxygenic photoautotrophy S oxidizing		30
	Rhodoplanes	22
	Chlorobium	2
	Blastochloris	1
dark oxidation of sulfur compounds		27
	Bosea	9
	Thiobacillus	5
	Tumebacillus	5
	Thioprofundum	3
	Alcaligenes	1
	Limnobacter	1
	Pseudaminobacter	1
	Pseudomonas	1
	Sulfuricella	1
fumarate respiration		21
	Anaeromyxobacter	8
	Rhizomicrobium	5
	Geobacter	3
	Desulfuromonas	2
	Desulfosporosinus	1
	Desulfovibrio	1
	Helicobacter	1
nitrite ammonification		18
	Anaeromyxobacter	8
	Petrimonas	7
	Clostridium sensu stricto	1
	Desulforhopalus	1
	Desulfovibrio	1
nitrate ammonification		17
	Anaeromyxobacter	8
	Petrimonas	7
	Desulforhopalus	1
	Desulfovibrio	1
aerobic anoxygenic phototrophy		16
	Porphyrobacter	15
	Erythromicrobium	1
chloroplasts		16
	Streptophyta	8
	Bacillariophyta	3
	Chlorophyta	2
dark thiosulfate oxidation		16
	Tumebacillus	5
	Thiobacillus	4
	Thioprofundum	3
	Limnobacter	1
	Pseudaminobacter	1
	Pseudomonas	1
	Sulfuricella	1
manganese oxidation		15
	Geodermatophilus	9
	Pedomicrobium	5
	Propionibacterium	1
methanogenesis		13
	Methanomassiliicoccus	7
	Methanobacterium	2
	Methanobrevibacter	2
	Methanoculleus	1
	Methanothrix	1
aromatic hydrocarbon degradation		12
	Rhodococcus	4
	Algiphilus	2
	Azoarcus	1
	Georgfuchsia	1
	Mycobacterium	1
	Paenibacillus	1
	Pseudomonas	1
	Ralstonia	1
hydrogenotrophic methanogenesis		12
	Methanomassiliicoccus	7
	Methanobacterium	2
	Methanobrevibacter	2
	Methanoculleus	1
plant pathogen		12
	Pseudomonas	3
	Stenotrophomonas	3
	Janthinobacterium	2
	Leifsonia	2
	Serratia	1
	Xanthomonas	1
aliphatic non methane hydrocarbon degradation		11
	Rhodococcus	4
	Alcanivorax	3
	Algiphilus	2
	Geobacillus	1
	Hydrocarboniphaga	1
methanotrophy		11
	Methylocaldum	4
	Methylobacter	1
	Methylocapsa	1
	Methyloparacoccus	1
	Pleomorphomonas	1
knallgas bacteria		9
	Anaeromyxobacter	8
	Hydrogenophilus	1
sulfite respiration		8
	Desulfovirga	3
	Desulfobulbus	1
	Desulfococcus	1
	Desulforhopalus	1
	Desulfovibrio	1
	Salmonella	1
invertebrate parasites		7
	Clostridium XI	3
	Lysinibacillus	2
	Arsenophonus	1
	Bacillus	1
methanogenesis by reduction of methyl compounds with H2		7
	Methanomassiliicoccus	7
dark sulfide oxidation		6
	Thiobacillus	5
	Alcaligenes	1
dark sulfur oxidation		5
	Thioprofundum	3
	Sulfuricella	1
	Thiobacillus	1
human pathogens diarrhea		5
	Bacteroides	1
	Clostridium XI	2
	Morganella	1
	Vibrio	1
human pathogens pneumonia		5
	Legionella	2
	Acinetobacter	1
	Pseudomonas	1
	Staphylococcus	1
human pathogens septicemia		5
	Streptococcus	2
	Acinetobacter	1
	Pseudomonas	1
	Staphylococcus	1
manganese respiration		5
	Geobacter	3
	Desulfuromonas	1
	Georgfuchsia	1
methanogenesis by CO2 reduction with H2		5
	Methanobacterium	2
	Methanobrevibacter	2
	Methanoculleus	1
thiosulfate respiration		5
	Alishewanella	1
	Desulfosporosinus	1
	Desulfovibrio	1
	Fusibacter	1
	Salmonella	1
plastic degradation		4
	Alcaligenes	1
	Pelotomaculum	1
	Pseudomonas	1
	Variovorax	1
sulfur respiration		4
	Desulfuromonas	2
	Alkaliphilus	1
	Fusibacter	1
anoxygenic photoautotrophy H2 oxidizing		3
	Rhodobacter	3
chlorate reducers		3
	Dechloromonas	3
arsenate detoxification		2
	Arthrobacter	1
	Variovorax	1
dissimilatory arsenate reduction		2
	Arthrobacter	1
	Variovorax	1
human pathogens gastroenteritis		2
	Campylobacter	1
	Salmonella	1
human pathogens meningitis		2
	Streptococcus	2
human pathogens nosocomia		2
	Acinetobacter	2
oil bioremediation		2
	Alcanivorax	1
	Thalassolituus	1
reductive acetogenesis		2
	Holophaga	1
	Oxobacter	1
anammox		1
	Candidatus Kuenenia	1
arsenite oxidation detoxification		1
	Alcaligenes	1
dark iron oxidation		1
	Thiobacillus	1
dissimilatory arsenite oxidation		1
	Alcaligenes	1
ligninolysis		1
	Micrococcus	1

## Sheet: Table S4
Table S4A Changes of relations among soil bacterial functional groups with soil physico-chemical parameters, leaf nutrients and fruit parameters of apple following the increment of replacing rate by biogas slurry for chemical N fertilizer (correlation coefficient, r). CK, control, no fertilizer and biogas slurry; CF, chemical fertilizer; CBS and BS, biogas slurry replacing 50% and 100% of chemica…
	CK VS CF											CBS VS CF			BS VS CF
	nitrate_reduction	aerobic_nitrite_oxidation	predatory_or_exoparasitic	intracellular_parasites	xylanolysis	photoheterotrophy	anoxygenic_photoautotrophy	photoautotrophy	anoxygenic_photoautotrophy_S_oxidizing	fumarate_respiration		manganese_respiration	reductive_acetogenesis		aerobic_nitrite_oxidation	nitrite_respiration	denitrification	nitrite_denitrification	nitrous_oxide_denitrification	aerobic_anoxygenic_phototrophy
Fruit_fresh_weight	-0.426067	0.548881	0.542694	0.537348	0.533796	0.612948	0.758956	0.758956	0.741576	0.680404		0.188001	-0.622095		0.767852	0.58218	0.554939	0.554939	0.554939	-0.403519
Fruit_dry_weight	0.0335192	0.141641	-0.032667	-0.0581987	-0.0239123	0.119283	0.252936	0.252936	0.202008	0.167773		0.229872	-0.61673		0.750221	0.48389	0.459593	0.459593	0.459593	-0.449701
Fruit_dry_matter.	0.705721	-0.614945	-0.87978	-0.926482	-0.864556	-0.767744	-0.802507	-0.802507	-0.856986	-0.822486		0.157622	-0.0767121		0.705601	0.390434	0.369105	0.369105	0.369105	-0.473745
Single_fruit_weight	0.2916	-0.225298	-0.180108	-0.125393	-0.199415	-0.356212	-0.0598357	-0.0598357	-0.0201555	-0.195081		0.828418	-0.892786		0.901371	0.779233	0.779286	0.779286	0.779286	-0.848221
solid_acid_ratio	-0.754945	0.591984	0.595093	0.558353	0.386641	0.433993	0.227911	0.227911	0.234059	0.309942		-0.135148	0.523061		0.224964	0.334464	0.346734	0.346734	0.346734	-0.591089
Fruit_soluble_solids	0.749848	-0.453896	-0.730938	-0.844168	-0.82023	-0.832418	-0.630788	-0.630788	-0.680821	-0.887961		-0.563001	0.482638		0.614864	0.215428	0.170881	0.170881	0.170881	-0.186606
Fruit_malic_acid	0.78053	-0.704715	-0.709446	-0.636507	-0.513312	-0.567108	-0.387976	-0.387976	-0.382431	-0.412673		0.0060326	-0.356408		0.0220458	-0.224856	-0.244372	-0.244372	-0.244372	0.375867
Leaf_total_N	-0.322906	0.497042	0.546345	0.412034	0.646154	0.756073	0.577767	0.577767	0.525432	0.543565		-0.312263	0.509288		-0.630057	-0.674498	-0.701649	-0.701649	-0.701649	0.95446
Leaf_total_P.	-0.426175	0.391549	0.56959	0.518905	0.690699	0.736822	0.473363	0.473363	0.465229	0.578308		-0.430586	0.640363		-0.370359	0.0794284	0.133761	0.133761	0.133761	-0.0364244
Leaf_total_K.	-0.94931	0.933216	0.866449	0.800533	0.600201	0.694128	0.649947	0.649947	0.63588	0.609267		-0.273061	-0.0179455		-0.18657	0.124914	0.145241	0.145241	0.145241	-0.237965
Soil_organic_matter	-0.936198	0.814701	0.948883	0.963443	0.79496	0.781671	0.751656	0.751656	0.785079	0.782738		0.925169	-0.804758		-0.923619	-0.854075	-0.83192	-0.83192	-0.83192	0.573326
Soil_alkali_N	-0.665547	0.46506	0.740722	0.781153	0.731849	0.642647	0.496012	0.496012	0.551986	0.616184		0.981068	-0.855026		-0.839184	-0.764064	-0.728374	-0.728374	-0.728374	0.4628
soil_available_P	-0.953094	0.806174	0.926974	0.964323	0.761567	0.755601	0.749825	0.749825	0.786967	0.794677		-0.0213105	0.544548		-0.79276	-0.782317	-0.783337	-0.783337	-0.783337	0.536393
soil_available_K	-0.976686	0.736865	0.860446	0.93775	0.699916	0.709479	0.659593	0.659593	0.704994	0.780274		0.85115	-0.893421		0.938641	0.778558	0.763428	0.763428	0.763428	-0.782176
Soil_porosity	0.669404	-0.411807	-0.46486	-0.597309	-0.423277	-0.51686	-0.47028	-0.47028	-0.498018	-0.669863		0.816988	-0.936458		0.736188	0.548988	0.542761	0.542761	0.542761	-0.470701
pH	0.700889	-0.688296	-0.940948	-0.935567	-0.97249	-0.922358	-0.895678	-0.895678	-0.92523	-0.898498		-0.844843	0.945261		0.961805	0.871254	0.859566	0.859566	0.859566	-0.896329
EC	0.699767	-0.798587	-0.855252	-0.797247	-0.661948	-0.609952	-0.75572	-0.75572	-0.769462	-0.590403		0.702664	-0.840564		0.852855	0.833039	0.843834	0.843834	0.843834	-0.821657
Table S4B Changes of relations among soil bacterial functional groups with soil physico-chemical parameters, leaf nutrients and fruit parameters of apple following the increment of replacing rate by biogas slurry for chemical N fertilizer (significant value, p). CK, control, no fertilizer and biogas slurry; CF, chemical fertilizer; CBS and BS, biogas slurry replacing 50% and 100% of chemical N, r…
	CK VS CF											CBS VS CF			BS VS CF
	nitrate_reduction	aerobic_nitrite_oxidation	predatory_or_exoparasitic	intracellular_parasites	xylanolysis	photoheterotrophy	anoxygenic_photoautotrophy	photoautotrophy	anoxygenic_photoautotrophy_S_oxidizing	fumarate_respiration		manganese_respiration	reductive_acetogenesis		aerobic_nitrite_oxidation	nitrite_respiration	denitrification	nitrite_denitrification	nitrous_oxide_denitrification	aerobic_anoxygenic_phototrophy
Fruit_fresh_weight	0.399572	0.259359	0.265875	0.271556	0.275356	0.195722	0.0801505	0.0801505	0.0915456	0.136891		0.721321	0.187234		0.0745835	0.22539	0.25304	0.25304	0.25304	0.427574
Fruit_dry_weight	0.94974	0.78896	0.951017	0.912801	0.964138	0.821925	0.628687	0.628687	0.70111	0.750702		0.661265	0.192193		0.0857927	0.330816	0.35915	0.35915	0.35915	0.37092
Fruit_dry_matter.	0.117158	0.193855	0.0208106	0.0079086	0.0262753	0.0746502	0.0546536	0.0546536	0.0292171	0.0444701		0.765525	0.885158		0.117248	0.444108	0.471485	0.471485	0.471485	0.342545
Single_fruit_weight	0.574998	0.667771	0.73276	0.812896	0.704843	0.488281	0.910354	0.910354	0.969771	0.71109		0.0416347	0.0166262		0.0141117	0.0677274	0.0676962	0.0676962	0.0676962	0.0328069
solid_acid_ratio	0.0827198	0.215753	0.212733	0.249506	0.448939	0.389882	0.664053	0.664053	0.655322	0.549974		0.798512	0.286961		0.668247	0.517012	0.500742	0.500742	0.500742	0.216626
Fruit_soluble_solids	0.0860373	0.365912	0.098852	0.0345331	0.045571	0.0397725	0.179311	0.179311	0.136555	0.018126		0.244726	0.332255		0.193931	0.681856	0.746174	0.746174	0.746174	0.72334
Fruit_malic_acid	0.066965	0.117916	0.114368	0.174177	0.297658	0.240533	0.447236	0.447236	0.454319	0.416129		0.990951	0.488025		0.966937	0.6684	0.640739	0.640739	0.640739	0.46275
Leaf_total_N	0.532476	0.315834	0.262022	0.416925	0.165658	0.0819938	0.229783	0.229783	0.284382	0.264954		0.546829	0.302116		0.179972	0.141683	0.120242	0.120242	0.120242	0.00306361
Leaf_total_P.	0.39944	0.442691	0.238012	0.291503	0.128705	0.0947798	0.342989	0.342989	0.352504	0.229242		0.394037	0.170751		0.469862	0.881108	0.800556	0.800556	0.800556	0.945388
Leaf_total_K.	0.00378907	0.00654123	0.0255626	0.0557127	0.207807	0.126028	0.162359	0.162359	0.174737	0.199181		0.600588	0.973085		0.723392	0.813603	0.78367	0.78367	0.78367	0.649791
Soil_organic_matter	0.00597626	0.0483223	0.00385263	0.00198018	0.0587519	0.0662976	0.0848541	0.0848541	0.0643228	0.0656763		0.00819003	0.0534579		0.00852831	0.0303876	0.0400021	0.0400021	0.0400021	0.234238
Soil_alkali_N	0.149082	0.352702	0.0921227	0.0666004	0.0982168	0.168735	0.316998	0.316998	0.256113	0.192701		0.000534263	0.0300029		0.0367133	0.0769318	0.100651	0.100651	0.100651	0.355362
soil_available_P	0.00324861	0.052712	0.00780439	0.00188661	0.0784978	0.082297	0.0860526	0.0860526	0.0632403	0.0589082		0.968039	0.263916		0.0599721	0.0659214	0.065329	0.065329	0.065329	0.272575
soil_available_K	0.000809001	0.0947502	0.027854	0.0056919	0.121564	0.114343	0.154092	0.154092	0.117706	0.0671151		0.0315853	0.0164333		0.00553191	0.0681255	0.0773297	0.0773297	0.0773297	0.0660036
Soil_porosity	0.145874	0.417207	0.352937	0.21059	0.403003	0.293748	0.346584	0.346584	0.314732	0.145495		0.0471751	0.00592812		0.0952149	0.259247	0.265804	0.265804	0.265804	0.346092
pH	0.120821	0.130597	0.00512773	0.00609367	0.00112481	0.00880835	0.015757	0.015757	0.00817691	0.0149311		0.0342431	0.00441257		0.00216047	0.0237963	0.0281978	0.0281978	0.0281978	0.0155644
EC	0.121678	0.0567654	0.0299116	0.0574957	0.152102	0.198536	0.0822206	0.0822206	0.0735951	0.217296		0.119469	0.0361033		0.0308845	0.0394867	0.0346775	0.0346775	0.0346775	0.0448734
